# Supplementary material
Source: Springer Nature journal article supplement (https://www.springermedizin.de/resource/supplementary/13033_2009_36_MOESM1_ESM.pdf/9651688)
Supplement: MOESM1 [file 9651688]

Table 3: Association of demographic data with PHQ score

| Demographic Data |                                 | Respondents (n=263)                         |                                             | P            |
|------------------|---------------------------------|---------------------------------------------|---------------------------------------------|--------------|
|                  |                                 | PHQ positive<br>(% of total<br>respondents) | PHQ negative<br>(% of total<br>respondents) |              |
| Age              | 18 ~ 29 years                   | 25 (9.5)                                    | 72 (27.5)                                   | <b>0.036</b> |
|                  | 30 ~ 39 years                   | 17 (6.5)                                    | 74 (28.1)                                   |              |
|                  | 40 ~ 49 years                   | 20 (7.6)                                    | 31 (11.8)                                   |              |
|                  | 50 ~ 59 years                   | 1 (0.4)                                     | 14 (5.3)                                    |              |
|                  | 60 ~ 70 years                   | 2 (0.8)                                     | 7 (2.7)                                     |              |
| Sex              | Female                          | 47 (17.9)                                   | 141 (53.6)                                  | 0.865        |
|                  | Male                            | 18 (6.8)                                    | 57 (21.7)                                   |              |
| Race/Ethnic      | Malay                           | 47 (17.9)                                   | 152 (53.6)                                  | 0.230        |
|                  | Chinese                         | 5 (1.9)                                     | 24 (9.1)                                    |              |
|                  | Indian                          | 11 (4.2)                                    | 20 (7.6)                                    |              |
|                  | Others                          | 2 (0.8)                                     | 2 (0.8)                                     |              |
| Education Level  | None/Primary                    | 8 (3.0)                                     | 19 (7.2)                                    | 0.822        |
|                  | Secondary                       | 41 (15.6)                                   | 129 (49.0)                                  |              |
|                  | College/Tertiary                | 16 (6.1)                                    | 50 (19.0)                                   |              |
| Marital Status   | Single                          | 7 (2.7)                                     | 18 (7.2)                                    | 0.472        |
|                  | Married                         | 56 (21.3)                                   | 188 (67.3)                                  |              |
|                  | Widow/Divorced                  | 2 (0.8)                                     | 2 (0.8)                                     |              |
| Occupation       | Professional, tech. & rel. work | 18 (6.8)                                    | 60 (22.8)                                   | 0.574        |
|                  | Clerical & Sales                | 16 (6.1)                                    | 53 (20.2)                                   |              |
|                  | Production workers & labourers  | 12 (4.6)                                    | 23 (8.7)                                    |              |
|                  | Economically inactive           | 19 (7.2)                                    | 62 (23.6)                                   |              |
| Income Group     | ≤ RM1, 000                      | 8 (3.0)                                     | 31 (11.8)                                   | 0.740        |
|                  | RM1, 001 ~ RM1, 999             | 33 (12.5)                                   | 88 (33.5)                                   |              |
|                  | RM2, 000 ~ RM2, 999             | 12 (4.6)                                    | 45 (17.1)                                   |              |
|                  | ≥ RM3, 000                      | 12 (4.6)                                    | 34 (12.9)                                   |              |

Note: total % exceeds 24.7% because some patients have more than one diagnosis.
